# Supplementary material for: Electrodeposited three-dimensional Ni–Si nanocable arrays as high performance anodes for lithium ion batteries
Source: Royal Society of Chemistry journal article supplement (doi:10.1039/c3nr02635c), 2013-01-01
Supplement: c3nr02635c.pdf [file c3nr02635c.pdf]

## Supplementary information

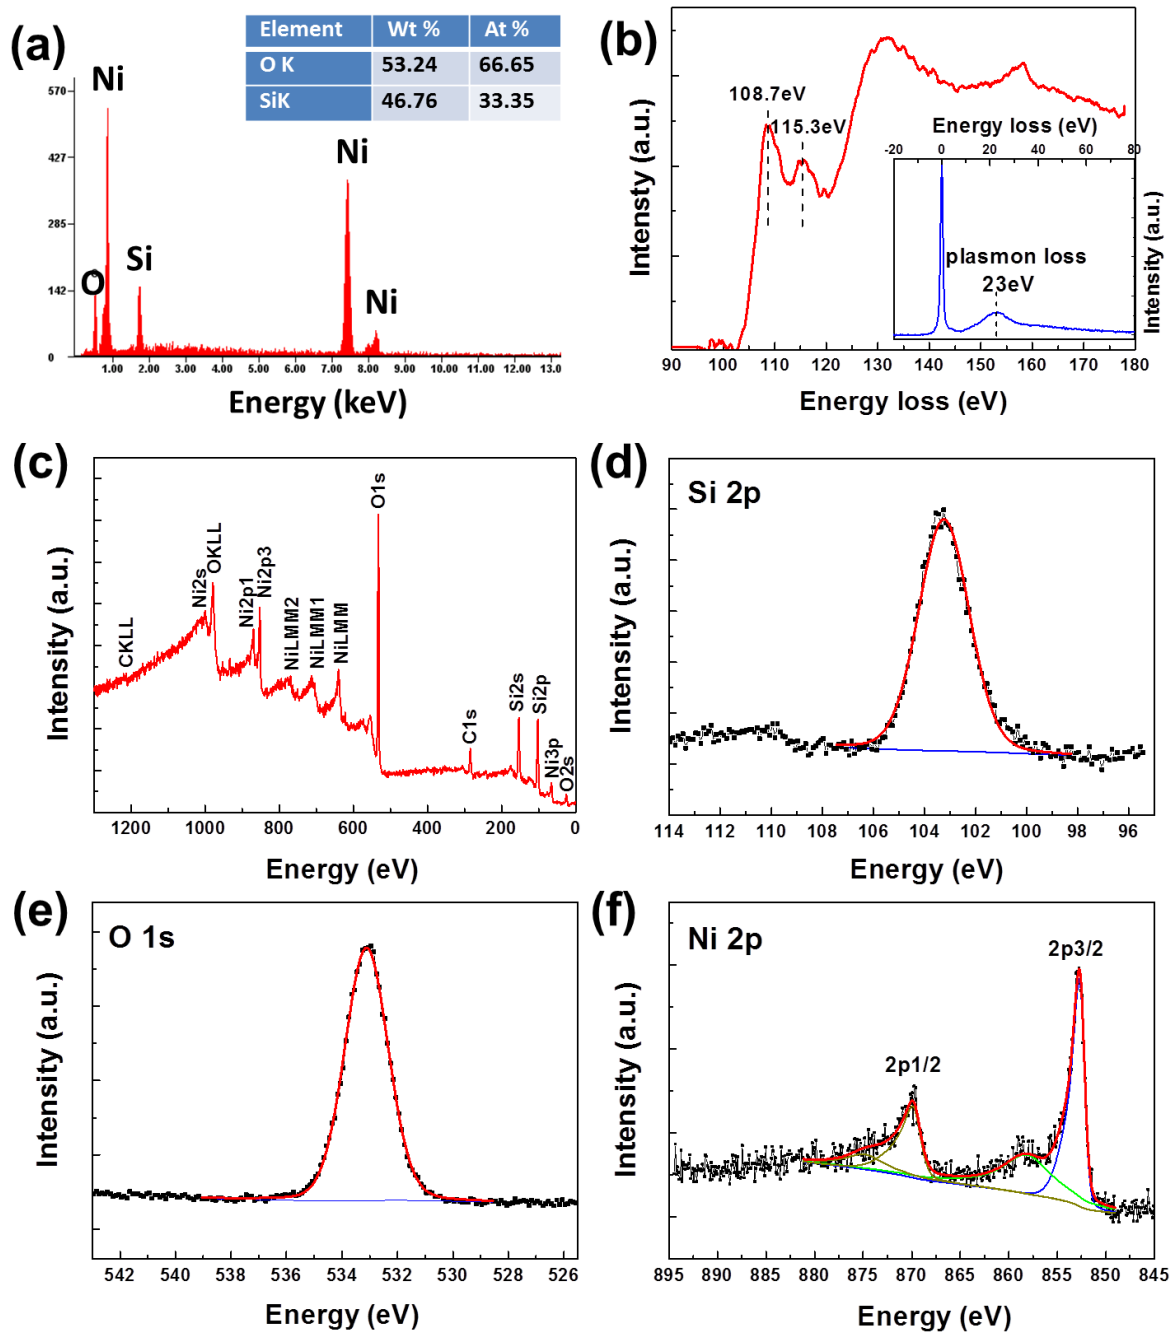

Figure S1. Characterizations of the oxidized Si sample (a) EDX; (b) Energy loss spectrum displaying the near-edge fine structure of Si L<sub>2,3</sub> edge. Plasmon peak at low energy is shown in the inset. (c) XPS survey scan, and fine scan spectra of (d) Si 2p; (e) O 1s; (f) Ni 2p peaks.
